# Supplementary material
Source: publisher figshare collection journal article supplement (https://karger.figshare.com/ndownloader/files/38921546)
Supplement: Supplementary file 1 [file 38921546]

**Complementary data**

Figures S1, S2, S3 and S4. Other karyotypes of *P. brassicae* after Giemsa staining (Figures S1 and S2, ganglia cells), C-banding (Figure S3, egg) and spermatocyte I at anaphasic segregation (Figure S4). The almost entirely heterochromatic chromosome (Figure S3) may be a W. All other C-bands are polymorphic and located at chromosome ends.
